# Supplementary material
Source: PubMed Central journal article supplement (PMC5517309)
Supplement: NIHMS869593-supplement-1.pdf [file NIHMS869593-supplement-1.pdf]

| Virus name*                                                         | Virus abbrev. (Fig. 1) | Acc. no. (genome) | Genome (nt) | RdRp (aa) | UGA no.† | UGG no. | %Trp=UGA | %Trp=UGG | Stop codon |
|---------------------------------------------------------------------|------------------------|-------------------|-------------|-----------|----------|---------|----------|----------|------------|
| Cryphonectria parasitica mitovirus 1                                | CpMV1                  | L31849            | 2728        | 809       | 9        | 8       | 53       | 47       | UAA        |
| Cryphonectria cubensis mitovirus 1a                                 |                        | AY328476          | 2555        | 744       | 20       | 14      | 59       | 41       | UAA        |
| Cryphonectria cubensis mitovirus 1b                                 | CcMV1b                 | AY328477          | 2601        | 744       | 16       | 9       | 64       | 36       | UAA        |
| Cryphonectria cubensis mitovirus 1c                                 |                        | AY328478          | 2501        | 744       | 20       | 14      | 59       | 41       | UAA        |
| Ophiostoma novo-ulmi mitovirus 3a                                   | OnuMV3a                | AJ004930          | 2617        | 718       | 12       | 3       | 80       | 20       | UAA        |
| Ophiostoma novo-ulmi mitovirus 4                                    | OnuMV4                 | A1132754          | 2599        | 783       | 11       | 2       | 85       | 15       | UAA        |
| Ophiostoma novo-ulmi mitovirus 5                                    | OnuMV5                 | A1132755          | 2474        | 729       | 8        | 0       | 100      | 0        | UAG        |
| Ophiostoma novo-ulmi mitovirus 6                                    | OnuMV6                 | A1132756          | 2343        | 695       | 7        | 2       | 78       | 22       | UAA        |
| Ophiostoma novo-ulmi mitovirus 1a                                   | OnuMV1a                | AM087548          | 3147        | 782       | 8        | 4       | 67       | 33       | UAA        |
| Ophiostoma novo-ulmi mitovirus 1b                                   | OnuMV1b                | AM087549          | 2572        | 776       | 9        | 6       | 60       | 40       | UAG        |
| Ophiostoma novo-ulmi mitovirus 3b                                   | OnuMV3b                | AM087550          | 2332        | 738       | 11       | 1       | 92       | 8        | UAA        |
| Ophiostoma novo-ulmi mitovirus 1c                                   |                        | KF026355          | 3107        | 788       | 13       | 3       | 81       | 19       | UAG        |
| Ophiostoma novo-ulmi mitovirus 7                                    | OnuMV7                 | KF031943          | 2804        | 720       | 3        | 4       | 43       | 57       | UAA        |
| Buergenerula spartinae mitovirus 1                                  | BsMV1                  | KJ485703          | 2735        | 809       | 16       | 6       | 73       | 37       | UAA        |
| Fusarium circinatum mitovirus 1                                     | FciMV1                 | KF803546          | 2419        | 731       | 12       | 1       | 92       | 8        | UAG        |
| Fusarium circinatum mitovirus 2-1                                   | FciMV2-1               | KF803547          | 2193        | 724       | 11       | 1       | 92       | 8        | UAG        |
| Fusarium globosum mitovirus 1                                       | FgMV1                  | LC006128          | 2414        | 717       | 13       | 2       | 87       | 13       | UAG        |
| Fusarium coeruleum mitovirus 1                                      | FcoMV1                 | LC006129          | 2423        | 757       | 13       | 3       | 81       | 19       | UAG        |
| Fusarium poae mitovirus 1                                           | FpMV1                  | LC150564          | 2397        | 726       | 12       | 1       | 92       | 8        | UAA        |
| Fusarium poae mitovirus 2                                           | FpMV2                  | LC150565          | 2414        | 764       | 10       | 3       | 77       | 23       | UAG        |
| Fusarium poae mitovirus 3                                           | FpMV3                  | LC150566          | 2718        | 789       | 16       | 1       | 94       | 6        | UAG        |
| Fusarium poae mitovirus 4                                           | FpMV4                  | LC150567          | 2387        | 689       | 6        | 3       | 67       | 33       | UAG        |
| Thielaviopsis basicola mitovirus                                    | TbMV                   | AY563138          | 2896        | 705       | 10       | 2       | 83       | 17       | UAG        |
| Thielaviopsis basicola mitovirus                                    |                        | DQ173015          | 2896        | 705       | 10       | 2       | 83       | 17       | UAG        |
| Botrytis cinerea mitovirus 1                                        |                        | EF580100          | 2804        | 738       | 11       | 2       | 85       | 15       | UAA        |
| Botrytis cinerea mitovirus 1                                        | BcMV1                  | LN827940          | 2873        | 738       | 10       | 2       | 83       | 17       | UAA        |
| Botrytis cinerea mitovirus 2                                        | BcMV2                  | LN827941          | 2497        | 710       | 11       | 0       | 100      | 0        | UAA        |
| Botrytis cinerea mitovirus 3                                        | BcMV3                  | LN827942          | 2922        | 786       | 11       | 2       | 85       | 15       | UAG        |
| Botrytis cinerea mitovirus 1                                        |                        | LN827944          | 2820        | 738       | 11       | 1       | 92       | 8        | UAA        |
| Botrytis cinerea mitovirus 2                                        |                        | LN827945          | 2496        | 710       | 11       | 0       | 100      | 0        | UAA        |
| Botrytis cinerea mitovirus 3                                        |                        | LN827946          | 2930        | 786       | 11       | 2       | 85       | 15       | UAG        |
| Botrytis cinerea mitovirus 4                                        | BcMV4                  | LN827947          | 2768        | 731       | 18       | 1       | 95       | 5        | UAA        |
| Sclerotinia homoeocarpa mitovirus                                   | ShMV                   | AY172454          | 2632        | 720       | 12       | 3       | 80       | 20       | UAA        |
| Sclerotinia sclerotiorum mitovirus 1                                |                        | JQ013377          | 2513        | 691       | 8        | 4       | 67       | 33       | UAG        |
| Sclerotinia sclerotiorum mitovirus 2                                |                        | JQ013378          | 2445        | 676       | 6        | 5       | 55       | 45       | UAA        |
| Sclerotinia sclerotiorum mitovirus 2                                | SsMV2                  | JX401536          | 2438        | 678       | 6        | 5       | 55       | 45       | UAG        |
| Sclerotinia sclerotiorum mitovirus 3                                | SsMV3                  | JX401537          | 2588        | 712       | 11       | 1       | 92       | 8        | UAG        |
| Sclerotinia sclerotiorum mitovirus 4                                |                        | JX401538          | 2744        | 731       | 16       | 3       | 84       | 16       | UAA        |
| Sclerotinia sclerotiorum mitovirus 6                                |                        | KC602001          | 2563        | 698       | 8        | 2       | 80       | 20       | UAA        |
| Sclerotinia sclerotiorum mitovirus 6                                | SsMV6                  | KF913881          | 2535        | 703       | 9        | 0       | 100      | 0        | UAG        |
| Sclerotinia sclerotiorum mitovirus 7                                |                        | KF913882          | 2648        | 703       | 10       | 8       | 56       | 44       | UAG        |
| Sclerotinia sclerotiorum mitovirus 8                                | SsMV8                  | KF913883          | 2565        | 698       | 8        | 2       | 80       | 20       | UAA        |
| Sclerotinia sclerotiorum mitovirus 9                                | SsMV9                  | KF913884          | 2562        | 695       | 10       | 9       | 53       | 47       | UAA        |
| Sclerotinia sclerotiorum mitovirus 11                               | SsMV11                 | KF913886          | 2708        | 683       | 4        | 4       | 50       | 50       | UAA        |
| Sclerotinia sclerotiorum mitovirus 12                               | SsMV12                 | KF913887          | 2593        | 693       | 4        | 9       | 31       | 69       | UAG        |
| Sclerotinia sclerotiorum mitovirus 14                               |                        | KF913889          | 2564        | 715       | 5        | 6       | 45       | 55       | UAA        |
| Sclerotinia sclerotiorum mitovirus 15                               | SsMV15                 | KF913890          | 2548        | 703       | 11       | 8       | 58       | 42       | UAA        |
| Sclerotinia sclerotiorum mitovirus 2                                |                        | KJ462508          | 2438        | 678       | 6        | 5       | 55       | 45       | UAG        |
| Sclerotinia sclerotiorum mitovirus 5                                |                        | KJ462509          | 2498        | 718       | 7        | 3       | 70       | 30       | UAG        |
| Sclerotinia sclerotiorum mitovirus 5                                |                        | KJ462510          | 2498        | 718       | 7        | 3       | 70       | 30       | UAG        |
| Sclerotinia sclerotiorum mitovirus 5                                |                        | KJ462511          | 2497        | 718       | 7        | 3       | 70       | 30       | UAG        |
| Sclerotinia sclerotiorum mitovirus 6                                |                        | KJ462512          | 2584        | 715       | 4        | 7       | 36       | 64       | UAA        |
| Sclerotinia sclerotiorum mitovirus 6                                |                        | KJ462513          | 2586        | 742       | 6        | 7       | 46       | 54       | UAA        |
| Sclerotinia sclerotiorum mitovirus 7                                | SsMV7                  | KJ462514          | 2815        | 689       | 11       | 8       | 58       | 42       | UAG        |
| Sclerotinia sclerotiorum mitovirus 1                                | SsMV1                  | KJ463570          | 2530        | 723       | 10       | 3       | 77       | 23       | UAG        |
| Sclerotinia sclerotiorum mitovirus 17                               |                        | KP900924          | 2447        | 678       | 6        | 5       | 55       | 45       | UAA        |
| Sclerotinia sclerotiorum mitovirus 18                               |                        | KP900925          | 2509        | 722       | 6        | 4       | 60       | 40       | UAG        |
| Sclerotinia sclerotiorum mitovirus 19                               |                        | KP900926          | 3185        | 688       | 10       | 7       | 59       | 41       | UAG        |
| Sclerotinia sclerotiorum mitovirus 20                               |                        | KP900927          | 2648        | 703       | 10       | 8       | 56       | 44       | UAG        |
| Sclerotinia nivialis mitovirus 1                                    | SsMV1                  | KT365895          | 2720        | 731       | 17       | 2       | 89       | 11       | UAA        |
| Sclerotinia nivialis mitovirus 2                                    | SsMV2                  | KT365896          | 2583        | 712       | 12       | 0       | 100      | 0        | UAG        |
| Sclerotinia sclerotiorum mitovirus 4                                | SsMV4                  | KT962974          | 2752        | 731       | 15       | 14      | 79       | 21       | UAA        |
| Sclerotinia sclerotiorum mitovirus 3                                |                        | LN827949          | 2617        | 711       | 12       | 0       | 100      | 0        | UAG        |
| Grremmeniella abietina mitochondrial RNA virus S1                   |                        | AF534641          | 2572        | 741       | 16       | 1       | 94       | 6        | UAA        |
| Grremmeniella abietina mitochondrial RNA virus S2                   | GaMRV-S2               | AY615209          | 2587        | 741       | 16       | 1       | 94       | 6        | UAA        |
| Grremmeniella abietina mitovirus                                    |                        | HE586988          | 2575        | 741       | 14       | 3       | 82       | 18       | UAA        |
| Grremmeniella abietina non-host-specific mitochondrial RNA virus S1 | GaMRV-S1               | JN654496          | 2544        | 691       | 3        | 3       | 50       | 50       | UAA        |
| Hymenoscyphus fraxineus mitovirus 1                                 | HfMV1                  | KJ667051          | 2387        | 717       | 12       | 7       | 63       | 37       | UAG        |
| Hymenoscyphus fraxineus mitovirus 1                                 |                        | KT809403          | 2350        | 717       | 12       | 7       | 63       | 37       | UAG        |
| Tuber aestivum mitovirus                                            | TaMV                   | HQ992989          | 3480        | 793       | 12       | 5       | 71       | 29       | UAG        |
| Tuber excavatum mitovirus                                           | TeMV                   | JN22389           | 3305        | 797       | 5        | 4       | 56       | 44       | UAG        |
| Alternaria brassicicola mitovirus                                   | AbMV                   | KP705075          | 2506        | 719       | 10       | 1       | 91       | 9        | UAA        |
| Alternaria arborescens mitovirus 1                                  | AaMV1                  | LC145036          | 2506        | 717       | 9        | 1       | 90       | 10       | UAG        |
| Macrophomina phaseolina mitovirus 1                                 | MpMV1                  | KP900894          | 2572        | 715       | 4        | 7       | 36       | 64       | UAA        |
| Macrophomina phaseolina mitovirus 3                                 | MpMV3                  | KT823703          | 4179        | 1029      | 0        | 25      | 0        | 100      | UAG        |
| Helicobasidium mompa mitovirus 1-18                                 | HmMV1-18               | AB110977          | 2411        | 700       | 11       | 2       | 85       | 15       | UAG        |
| Cronartium ribicola mitovirus 1                                     | CrMV1                  | KT921179          | 2715        | 800       | 18       | 6       | 75       | 25       | UAA        |
| Cronartium ribicola mitovirus 2                                     | CrMV2                  | KT921180          | 2471        | 689       | 8        | 6       | 57       | 43       | UAG        |
| Cronartium ribicola mitovirus 3                                     | CrMV3                  | KT921181          | 2522        | 713       | 10       | 6       | 63       | 38       | UAG        |
| Cronartium ribicola mitovirus 4                                     | CrMV4                  | KT921182          | 2479        | 721       | 16       | 4       | 80       | 20       | UAG        |
| Cronartium ribicola mitovirus 5                                     | CrMV5                  | KT921183          | 2631        | 772       | 13       | 6       | 68       | 32       | UAA        |
| Heterobasidium annosum mitovirus 1                                  | HaMV1                  | KJ873059          | 4379        | 836       | 9        | 12      | 43       | 57       | UAA        |
| Thanatephorus cucumeris mitovirus                                   | TcMV                   | U51331            | 3570        | 754       | 0        | 14      | 0        | 100      | UAA        |
| Rhizoctonia solani mitovirus 1 RS002                                | RsMV1-RS002            | KC792591          | 2797        | 826       | 0        | 11      | 0        | 100      | UAA        |
| Rhizoctonia solani mitovirus 1 RS006-2                              |                        | KC792598          | 2779        | 826       | 0        | 11      | 0        | 100      | UAA        |
| Rhizoctonia cerealis mitovirus                                      | RcMV                   | KM517201          | 3149        | 812       | 0        | 18      | 0        | 100      | UAA        |
| Rhizoctonia solani mitovirus 11                                     | RsMV11                 | KP900906          | 3283        | 905       | 0        | 17      | 0        | 100      | UAG        |
| Rhizoctonia solani mitovirus 12                                     | RsMV12                 | KP900907          | 3378        | 746       | 3        | 11      | 21       | 79       | UAA        |
| Rhizoctonia solani mitovirus 13                                     | RsMV13                 | KP900908          | 3039        | 917       | 0        | 17      | 0        | 100      | UAG        |
| Rhizoctonia solani mitovirus 15                                     | RsMV15                 | KP900910          | 3901        | 961       | 1        | 14      | 7        | 93       | UAA        |
| Rhizoctonia solani mitovirus 2                                      | RsMV2                  | KP900911          | 2865        | 716       | 0        | 20      | 0        | 100      | UAA        |
| Rhizoctonia solani mitovirus 6                                      | RsMV6                  | KP900915          | 2615        | 657       | 0        | 15      | 0        | 100      | UAG        |
| Rhizoctonia solani mitovirus 8                                      | RsMV8                  | KP900917          | 3225        | 890       | 2        | 21      | 9        | 91       | UAG        |
| Binucleate Rhizoctonia sp. mitovirus K1                             | BRMV-K1                | KR005622          | 2794        | 829       | 0        | 11      | 0        | 100      | UAA        |
| Rhizoctonia oryzae-sativae mitovirus 1                              | RosMV1                 | KU057949          | 3038        | 820       | 0        | 13      | 0        | 100      | UAG        |
| Agaricus bisporus mitovirus 1                                       | AbMV1                  | KY357500          | 3439        | 956       | 5        | 19      | 21       | 79       | UAA        |
| Clitocybe odora mitovirus                                           | CoMV                   | HE717021          | 3765        | 1137      | 1        | 25      | 4        | 96       | UAG        |
| Rhizoglyphus clarus RF1 mitovirus                                   | RcMV-RF1               | AB558120          | 2895        | 820       | 0        | 17      | 0        | 100      | UAA        |
| Rhizoglyphus sp. HR1 mitovirus                                      | RMV-HR1                | AB855794          | 3668        | 835       | 0        | 15      | 0        | 100      | UAA        |
|                                                                     |                        | medians:          | 2599        | 726       | 10       | 4       | 67       | 33       |            |
| Saccharomyces cerevisiae naravirus 235 [T]                          | ScRNV235               | U90136            | 2891        | 941       | 0        | 20      | 0        | 100      | UGA        |
| Saccharomyces cerevisiae naravirus 205 [W]                          | ScRNV205               | AF039063          | 2514        | 829       | 0        | 18      | 0        | 100      | UGA        |

\* Viruses are grouped as follows, top to bottom: mitoviruses from ascomycetes (cyan), basidiomycetes (green), and glomeromycetes (orange); naraviruses from ascomycetes (cyan). Mitoviruses with no or few UGA(Trp) codons are shaded (%Trp=UGA values <21%).

† In RdRp ORF, not including stop codon
