# Supplementary material
Source: PubMed Central journal article supplement (PMC5517309)
Supplement: NIHMS869593-supplement-2.pdf [file NIHMS869593-supplement-2.pdf]

| Summary of mitoviruses from Table S1:*                 |          | Taxonomic classification of host fungus:† |                     |                       |                    |                    |                     |                           | Fungi with complete and annotated mitochondrial genome sequences:‡ |           |           |             |
|--------------------------------------------------------|----------|-------------------------------------------|---------------------|-----------------------|--------------------|--------------------|---------------------|---------------------------|--------------------------------------------------------------------|-----------|-----------|-------------|
| Grouping by related host genera                        | %Trp=UGA | Phylum                                    | Subphylum           | Class                 | Subclass           | Order              | Suborder            | Family                    | Species name‡                                                      | Acc. no.  | %Trp=UGA§ | tRNA-Trp    |
| <i>Cryphonectria</i> mitoviruses                       | 53–64    | Ascomycota                                | Peizizomycotina     | Sordariomycetes       | Sordariomycetidae  | Diaporthales       | none                | <b>Cryphonectriaceae</b>  | <i>Chrysosporthe austroafricana</i>                                | NC_030522 | 97        | UCA         |
|                                                        |          |                                           |                     |                       |                    |                    |                     |                           | <i>Chrysosporthe cubensis</i>                                      | NC_030524 | 95        | UCA         |
|                                                        |          |                                           |                     |                       |                    |                    |                     |                           | <i>Chrysosporthe deuterocubensis</i>                               | NC_030523 | 95        | UCA         |
|                                                        |          |                                           |                     |                       |                    |                    |                     |                           | <i>Cryphonectria parasitica</i>                                    | KT428651  | 95        | UCA         |
| <i>Ophiostoma</i> mitoviruses                          | 43–100   | Ascomycota                                | Peizizomycotina     | Sordariomycetes       | Sordariomycetidae  | Ophiostomatales    | none                | <b>Ophiostomataceae</b>   | <i>Sporothrix schenckii</i>                                        | NC_015923 | 93        | UCA         |
| <i>Buergenerula</i> mitovirus                          | 73       | Ascomycota                                | Peizizomycotina     | Sordariomycetes       | Sordariomycetidae  | Magnaporthales     | none                | Magnaporthaceae           | na                                                                 | na        | na        | na          |
| <i>Fusarium</i> mitoviruses                            | 67–94    | Ascomycota                                | Peizizomycotina     | Sordariomycetes       | Hypocreomycetidae  | Hypocreales        | none                | <b>Nectriaceae</b>        | <i>Fusarium circinatum</i>                                         | NC_022681 | 97        | UCA         |
|                                                        |          |                                           |                     |                       |                    |                    |                     |                           | <i>Fusarium graminearum</i>                                        | NC_009493 | 98        | UCA         |
|                                                        |          |                                           |                     |                       |                    |                    |                     |                           | <i>Gibberella moniliformis</i>                                     | NC_016687 | 97        | UCA         |
|                                                        |          |                                           |                     |                       |                    |                    |                     |                           | <i>Ilyonectria destructans</i>                                     | NC_030340 | 97        | UCA         |
|                                                        |          |                                           |                     |                       |                    |                    |                     |                           | <i>Nectria cinnabarina</i>                                         | NC_030252 | 95        | UCA         |
| <i>Thielaviopsis</i> mitoviruses                       | 83       | Ascomycota                                | Peizizomycotina     | Sordariomycetes       | Hypocreomycetidae  | Microascales       | none                | <b>Ceratocystidaceae</b>  | <i>Ceratocystis cacaofunesta</i>                                   | NC_020430 | 95        | UCA,UCA     |
| <i>Botrytis</i> & <i>Sclerotinia</i> mitoviruses       | 31–100   | Ascomycota                                | Peizizomycotina     | Leotiomycetes         | none               | Helotiales         | none                | <b>Sclerotiniaceae</b>    | <i>Botrytis cinerea</i>                                            | KC832409  | 95        | UCA,UCA     |
|                                                        |          |                                           |                     |                       |                    |                    |                     |                           | <i>Sclerotinia borealis</i>                                        | NC_025200 | 80        | CCA,UCA     |
|                                                        |          |                                           |                     |                       |                    |                    |                     |                           | <i>Sclerotinia sclerotiorum</i>                                    | KT283062  | 81        | UCA,UCA,UCA |
| <i>Gremmeniella</i> & <i>Hymenoscyphus</i> mitoviruses | 50–94    | Ascomycota                                | Peizizomycotina     | Leotiomycetes         | none               | Helotiales         | none                | <b>Helotiaceae</b>        | <i>Cairneyella variabilis</i>                                      | NC_029759 | 100       | UCA         |
|                                                        |          |                                           |                     |                       |                    |                    |                     |                           | <i>Glaera lozoyensis</i>                                           | NC_031375 | 89        | UCA         |
| <i>Tuber</i> mitoviruses                               | 56–71    | Ascomycota                                | Peizizomycotina     | Peizizomycetes        | none               | Pezizales          | none                | Tuberaceae                | <i>Pyronema omphalodes</i>                                         | NC_029745 | 83        | UCA         |
| <i>Alternaria</i> mitoviruses                          | 90–91    | Ascomycota                                | Peizizomycotina     | Dothideomycetes       | Pleosporomycetidae | Pleosporales       | <b>Pleosporinae</b> | Pleosporaceae             | <i>Didymella pinodes</i>                                           | NC_029396 | 97        | UCA         |
|                                                        |          |                                           |                     |                       |                    |                    |                     |                           | <i>Phaeosphaeria nodorum</i>                                       | NC_009746 | 97        | UCA         |
| <i>Macrophoma</i> mitoviruses                          | 0–36     | Ascomycota                                | Peizizomycotina     | Dothideomycetes       | incertae sedis     | Botryosphaeriales  | none                | Botryosphaeriaceae        | na                                                                 | na        | na        | na          |
| <i>Helicobasidium</i> mitovirus                        | 85       | Basidiomycota                             | Pucciniomycotina    | Pucciniomycetes       | none               | Helicobasidiales   | none                | Helicobasidiaceae         | na                                                                 | na        | na        | na          |
| <i>Cronartium</i> mitoviruses                          | 57–80    | Basidiomycota                             | Pucciniomycotina    | Pucciniomycetes       | none               | <b>Pucciniales</b> | none                | Cronartiaceae             | <i>Phakopsora meibomiaae</i>                                       | NC_014352 | 69        | UCA         |
|                                                        |          |                                           |                     |                       |                    |                    |                     |                           | <i>Phakopsora pachyrhizi</i>                                       | NC_014344 | 72        | UCA         |
| <i>Heterobasidium</i> mitovirus                        | 43       | Basidiomycota                             | Agaricomycotina     | Agaricomycetes        | incertae sedis     | Russulales         | none                | <b>Bondarzewiaceae</b>    | <i>Heterobasidium irregulare</i>                                   | NC_024555 | 79        | CCA,UCA     |
| <i>Rhizoctonia</i> mitoviruses                         | 0–21     | Basidiomycota                             | Agaricomycotina     | Agaricomycetes        | incertae sedis     | Cantharellales     | none                | <b>Ceratobasidiaceae</b>  | <i>Rhizoctonia solani</i>                                          | NC_021436 | 2         | CCA         |
| <i>Agaricus</i> mitovirus                              | 21       | Basidiomycota                             | Agaricomycotina     | Agaricomycetes        | Agaricomycetidae   | Agaricales         | none                | <b>Agaricaceae</b>        | <i>Agaricus bisporus</i>                                           | JX271275  | 0         | CCA         |
| <i>Clitocybe</i> mitovirus                             | 4        | Basidiomycota                             | Agaricomycotina     | Agaricomycetes        | Agaricomycetidae   | Agaricales         | none                | <b>Tricholomataceae</b>   | <i>Tricholoma matsutake</i>                                        | NC_028135 | 2         | CCA         |
| <i>Rhizophagus</i> mitoviruses                         | 0        | Mucoromycota                              | Glomeromycotina     | Glomeromycetes        | none               | Glomerales         | none                | <b>Glomeraceae</b>        | <i>Glomus cerebriforme</i>                                         | NC_022144 | 1         | CCA         |
|                                                        |          |                                           |                     |                       |                    |                    |                     |                           | <i>Glomus</i> sp. DAOM 229456                                      | JX065416  | 1         | CCA         |
|                                                        |          |                                           |                     |                       |                    |                    |                     |                           | <i>Rhizophagus fasciculatus</i>                                    | NC_029185 | 1         | CCA         |
|                                                        |          |                                           |                     |                       |                    |                    |                     |                           | <i>Rhizophagus intradices</i>                                      | NC_012056 | 4         | CCA         |
|                                                        |          |                                           |                     |                       |                    |                    |                     |                           | <i>Rhizophagus irregularis</i>                                     | NC_014489 | 3         | CCA         |
| none yet reported                                      | na       | Mucoromycota                              | Glomeromycotina     | Glomeromycetes        | none               | Diversisporales    | none                | <b>Gigasporaceae</b>      | <i>Gigaspora margarita</i>                                         | NC_016684 | 2         | CCA         |
|                                                        |          |                                           |                     |                       |                    |                    |                     |                           | <i>Gigaspora rosa</i>                                              | NC_016985 | 0         | CCA         |
| none yet reported                                      | na       | Mucoromycota                              | Mortierellomycotina | none                  | none               | Mortierellales     | none                | <b>Mortierellaceae</b>    | <i>Mortierella verticillata</i>                                    | NC_006838 | 3         | CCA         |
| none yet reported                                      | na       | Mucoromycota                              | Mucoromycotina      | none                  | none               | Mucorales          | none                | <b>Cunninghamiaceae</b>   | <i>Absidia glauca</i>                                              | KU196782  | 0         | CCA         |
| none yet reported                                      | na       | Mucoromycota                              | Mucoromycotina      | none                  | none               | Mucorales          | none                | <b>Lichtheimiaceae</b>    | <i>Lichtheimia hongkongensis</i>                                   | NC_024200 | 0         | CCA         |
| none yet reported                                      | na       | Mucoromycota                              | Mucoromycotina      | none                  | none               | Mucorales          | Mucorineae          | <b>Mucoraceae</b>         | <i>Parasitella parasitica</i>                                      | NC_024944 | 0         | CCA         |
|                                                        |          |                                           |                     |                       |                    |                    |                     |                           | <i>Mucor circinelloides</i>                                        | KR809877  | 0         | CCA         |
| none yet reported                                      | na       | Mucoromycota                              | Mucoromycotina      | none                  | none               | Mucorales          | Mucorineae          | <b>Rhizopodaceae</b>      | <i>Rhizopus arryzae</i>                                            | NC_006836 | 0         | CCA         |
| none yet reported                                      | na       | Mucoromycota                              | Mucoromycotina      | none                  | none               | Mucorales          | none                | <b>Phycomycetaceae</b>    | <i>Phycomyces blakesleeianus</i>                                   | NC_027730 | 0         | CCA         |
| none yet reported                                      | na       | Zoopagomycota                             | Kickellomycotina    | none                  | none               | Harpellales        | none                | <b>Legeriomycetaceae</b>  | <i>Zancudomyces culisetiae</i>                                     | NC_006837 | 0         | CCA         |
| none yet reported                                      | na       | Blastocladiomycota                        | none                | Blastocladiomycetes   | none               | Blastocladales     | none                | <b>Blastocladiaceae</b>   | <i>Allomyces macrogynus</i>                                        | NC_001715 | 0         | CCA         |
|                                                        |          |                                           |                     |                       |                    |                    |                     |                           | <i>Blastocladiella emersonii</i>                                   | NC_011360 | 0         | CCA         |
| none yet reported                                      | na       | Chytridiomycota                           | none                | Chytridiomycetes      | none               | Rhizophydiales     | none                | <b>Rhizophydiaceae</b>    | <i>Rhizophyidium</i> sp. 136                                       | NC_003053 | 0¶        | CCA         |
| none yet reported                                      | na       | Chytridiomycota                           | none                | Chytridiomycetes      | none               | Spizellomycetales  | none                | <b>Spizellomycetaceae</b> | <i>Spizellomyces punctatus</i>                                     | NC_003052 | 0¶        | CCA         |
| none yet reported                                      | na       | Chytridiomycota                           | none                | Monoblepharidomycetes | none               | Monoblepharidales  | none                | <b>Harpochytriaceae</b>   | <i>Harpochytrium</i> sp. JEL105                                    | NC_004623 | 0         | CCA         |
|                                                        |          |                                           |                     |                       |                    |                    |                     |                           | <i>Harpochytrium</i> sp. JEL94                                     | NC_004760 | 0         | CCA         |
| none yet reported                                      | na       | Chytridiomycota                           | none                | Monoblepharidomycetes | none               | Monoblepharidales  | none                | <b>Monoblepharidaceae</b> | <i>Monoblepharella</i> sp. JEL15                                   | NC_004624 | 0         | CCA         |
| none yet reported                                      | na       | Chytridiomycota                           | none                | Monoblepharidomycetes | none               | Monoblepharidales  | none                | <b>incertae sedis</b>     | <i>Hyaloraphidium curvatum</i>                                     | NC_003048 | 0         | CCA         |

\* Summarized from Table S1. Color-coding of mitoviruses and fungal hosts as in Table S1. na, not available, in this and other columns.

† The higher taxon (genus, suborder, or order) from which the complete mitochondrial sequences are derived is bolded and underlined. For each of these taxa, all complete mitochondrial sequences currently in GenBank NR/NT were used except in the case of families Nectriaceae and Glomeraceae, for which a representative subset of five of the available sequences was used.

‡ Species with complete mitochondrial genome sequences available and annotated for coding sequences in the indicated accessions in NR/NT at GenBank. Species of more basal fungi (other mucoromycetes, zoopagomycetes, blastocladiomycetes, and chytridiomycetes) for which complete and annotated mitochondrial genome sequences are available in NR/NT at GenBank, but which have not yet been shown to host mitoviruses, are listed at bottom.

§ In concatenated mitochondrial core protein ORFs, not including stop codons. Low %Trp=UGA values represented in Fig. 2 are shaded.

¶ The anticodon of the mitochondrially encoded tRNA-Trp is listed, as annotated in GenBank and also confirmed by ARAGORN. A few species have 2 or 3 mitochondrially encoded tRNA-Trp genes as noted.

¶¶ These mitochondrial core protein sequences include UGA stop codons.
